# Supplementary material for: Immunomagnetic bead-based biotin-streptavidin system for highly efficient detection of aflatoxin B1 in agricultural products
Source: Royal Society of Chemistry journal article supplement (doi:10.1039/c8ra04460k), 2018-01-01
Supplement: c8ra04460k1.pdf [file c8ra04460k1.pdf]

### Supplementary data

**Fig. S1** Effect of organic solvent, ionic strength and pH value on the sensitivity of IMA and BAS-IMB.

**Fig. S2** The matrix effect of agricultural product samples on the sensitivity of BAS-IMB for detecting AFB<sub>1</sub>.

**Fig. S3** The example of chromogenic results of BAS-IMB in standard serial concentrations of AFB<sub>1</sub>.

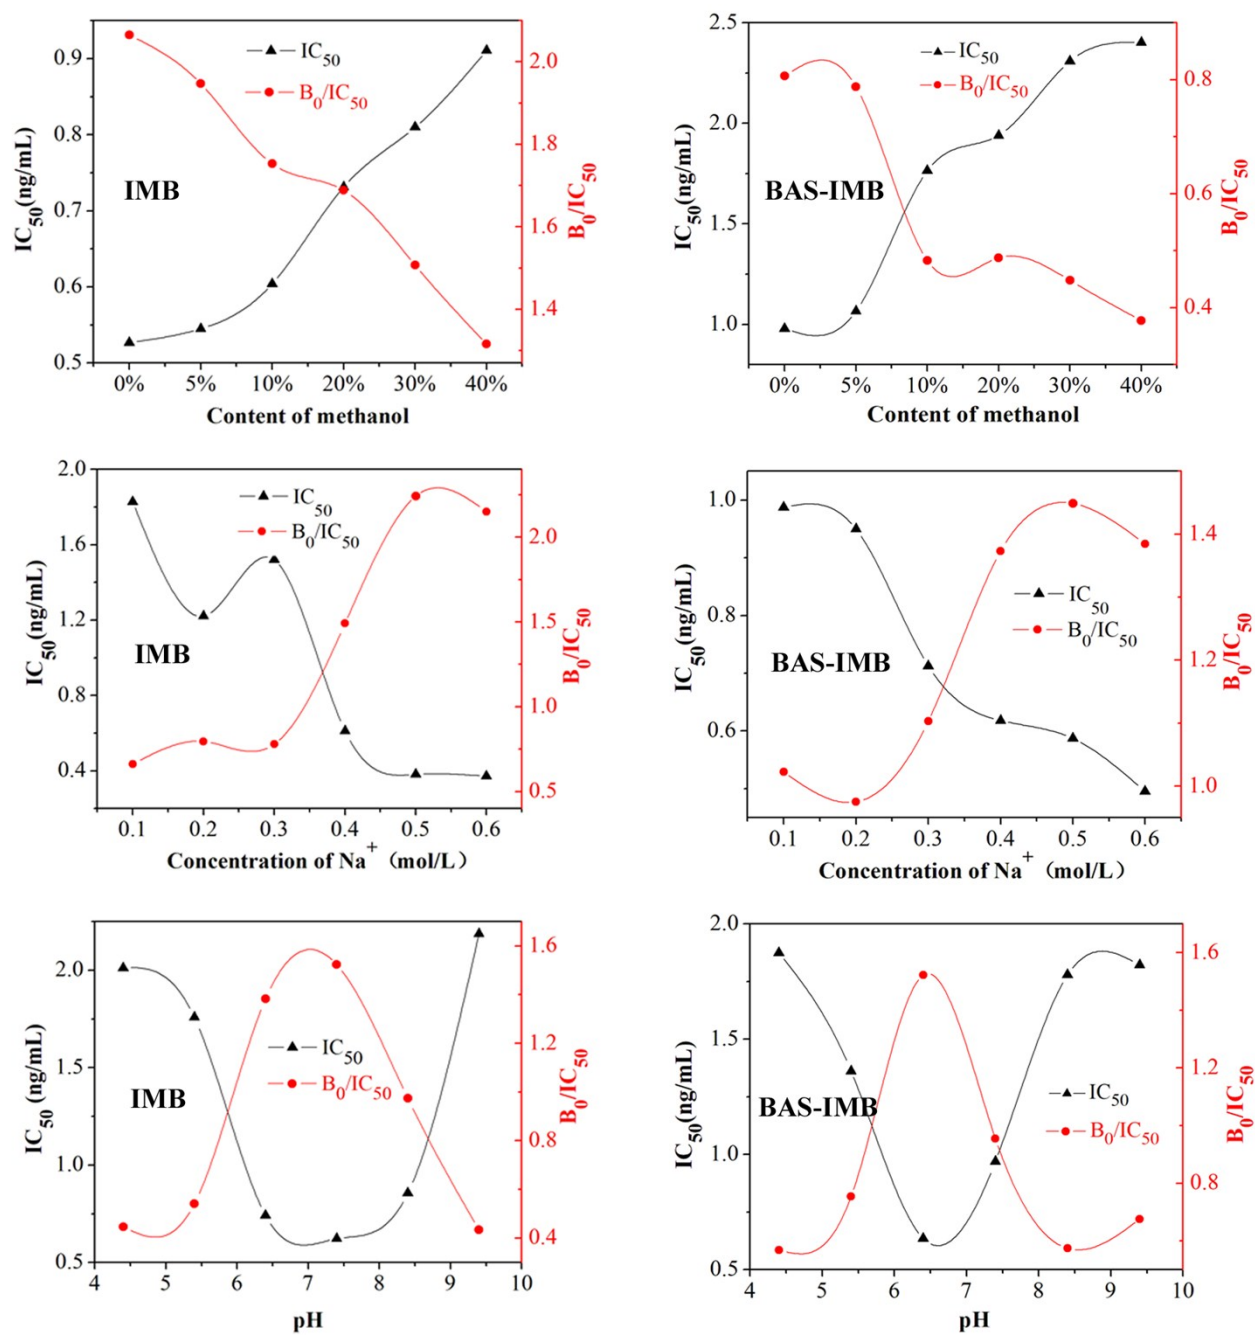

**Fig. S1** Effect of organic solvent, ionic strength and pH value on the sensitivity of IMA and BAS-

IMA.

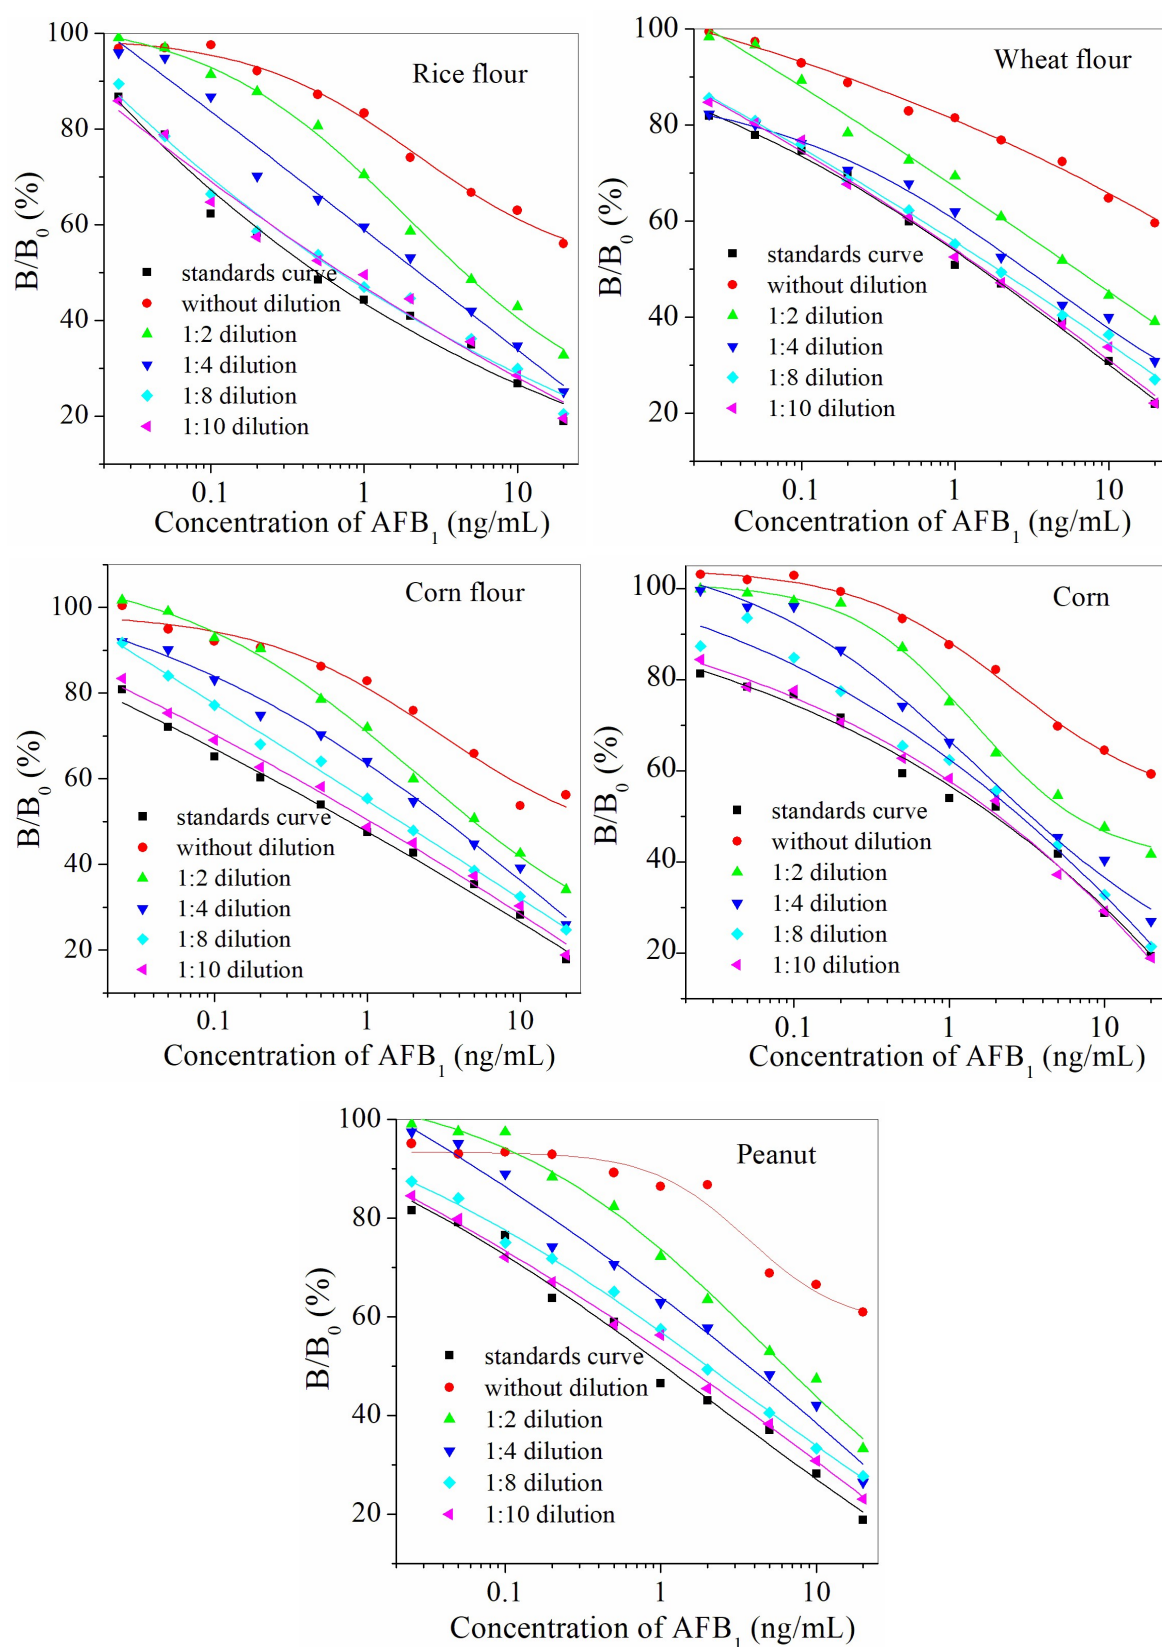

**Fig. S2** The matrix effect of samples on the sensitivity of the BAS-IMB for detecting  $AFB_1$ .

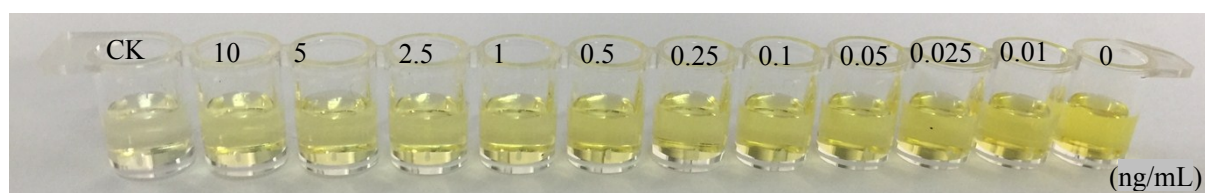

**Fig. S3** The example of chromogenic results of BAS-IMB in standard serial concentrations of AFB<sub>1</sub>.
